# Supplementary material
Source: publisher figshare collection journal article supplement (https://gsajournals.figshare.com/articles/dataset/_/6533933)
Supplement: Supplementary file 1 [file 1]

## Sheet: Plan1
Supplementary Material 2: Description of the functional annotation of the significant QTLs detected in the joint analysis by RHM
Trait	Chrom.	Minor - Major Position (Mb)	Gene ID	Transcript ID	Transcript Description
Architecture / Lodging	Chr01	15.53-16.84	Phvul.001G087000	Phvul.001G087000.1	auxin signaling F-box 2
			Phvul.001G087100	Phvul.001G087100.1	GRAM domain family protein
			Phvul.001G087200	Phvul.001G087200.1	translocon-associated protein beta (TRAPB) family protein
			Phvul.001G087300	Phvul.001G087300.1	B-box type zinc finger protein with CCT domain
			Phvul.001G087400	Phvul.001G087400.1	MuDR family transposase
			Phvul.001G087500	Phvul.001G087500.3	Endosomal targeting BRO1-like domain-containing protein
			Phvul.001G087500	Phvul.001G087500.2	Endosomal targeting BRO1-like domain-containing protein
			Phvul.001G087500	Phvul.001G087500.1	Endosomal targeting BRO1-like domain-containing protein
			Phvul.001G087600	Phvul.001G087600.1	Uncharacterised protein family (UPF0497)
			Phvul.001G087700	Phvul.001G087700.1	Esterase/lipase/thioesterase family protein
			Phvul.001G087800	Phvul.001G087800.1	Esterase/lipase/thioesterase family protein
			Phvul.001G087900	Phvul.001G087900.1	C2H2 and C2HC zinc fingers superfamily protein
			Phvul.001G088100	Phvul.001G088100.1	hydroxyproline-rich glycoprotein family protein
			Phvul.001G088100	Phvul.001G088100.2	hydroxyproline-rich glycoprotein family protein
			Phvul.001G088200	Phvul.001G088200.1	WRKY DNA-binding protein 75
			Phvul.001G088400	Phvul.001G088400.2	non-intrinsic ABC protein 14
			Phvul.001G088400	Phvul.001G088400.1	non-intrinsic ABC protein 14
			Phvul.001G088800	Phvul.001G088800.1	Protein of unknown function (DUF1997)
			Phvul.001G088900	Phvul.001G088900.1	YELLOW STRIPE like 6
			Phvul.001G089000	Phvul.001G089000.1	Plant transposase (Ptta/En/Spm family)
			Phvul.001G089100	Phvul.001G089100.1	TEOSINTE BRANCHED 1, cycloidea, PCF (TCP)-domain family protein 20
			Phvul.001G089200	Phvul.001G089200.1	ACT domain repeat 6
			Phvul.001G089200	Phvul.001G089200.2	ACT domain repeat 6
			Phvul.001G089400	Phvul.001G089400.1	Tetratricopeptide repeat (TPR)-like superfamily protein
			Phvul.001G089400	Phvul.001G089400.3	Tetratricopeptide repeat (TPR)-like superfamily protein
			Phvul.001G089400	Phvul.001G089400.2	Tetratricopeptide repeat (TPR)-like superfamily protein
			Phvul.001G089500	Phvul.001G089500.1	GYF domain-containing protein
			Phvul.001G089600	Phvul.001G089600.1	actin related protein 2
			Phvul.001G089700	Phvul.001G089700.1	HXXXD-type acyl-transferase family protein
			Phvul.001G089800	Phvul.001G089800.1	Pollen Ole e 1 allergen and extensin family protein
			Phvul.001G089900	Phvul.001G089900.1	RGA-like 1
			Phvul.001G090100	Phvul.001G090100.1	exocyst subunit exo70 family protein C2
Architecture	Chr08	5.54 - 7.48	Phvul.008G061100	Phvul.008G061100.1	cysteine synthase C1
			Phvul.008G061200	Phvul.008G061200.1	Small GTP-binding protein
			Phvul.008G061200	Phvul.008G061200.2	Small GTP-binding protein
			Phvul.008G061200	Phvul.008G061200.3	Small GTP-binding protein
			Phvul.008G061300	Phvul.008G061300.1	Disease resistance protein (CC-NBS-LRR class) family
			Phvul.008G061300	Phvul.008G061300.2	Disease resistance protein (CC-NBS-LRR class) family
			Phvul.008G061800	Phvul.008G061800.1	origin recognition complex protein 5
			Phvul.008G061800	Phvul.008G061800.2	origin recognition complex protein 5
			Phvul.008G061800	Phvul.008G061800.3	origin recognition complex protein 5
			Phvul.008G061900	Phvul.008G061900.1	Major facilitator superfamily protein
			Phvul.008G062000	Phvul.008G062000.1	SKP1-like 21
			Phvul.008G062000	Phvul.008G062000.2	SKP1-like 21
			Phvul.008G062000	Phvul.008G062000.3	SKP1-like 21
			Phvul.008G062000	Phvul.008G062000.4	SKP1-like 21
			Phvul.008G062000	Phvul.008G062000.5	SKP1-like 21
			Phvul.008G062000	Phvul.008G062000.6	SKP1-like 21
			Phvul.008G062100	Phvul.008G062100.1	SIGNAL PEPTIDE PEPTIDASE-LIKE 4
			Phvul.008G062100	Phvul.008G062100.2	SIGNAL PEPTIDE PEPTIDASE-LIKE 4
			Phvul.008G062200	Phvul.008G062200.1	U-box domain-containing protein kinase family protein
			Phvul.008G062200	Phvul.008G062200.2	U-box domain-containing protein kinase family protein
			Phvul.008G062300	Phvul.008G062300.1	Protein of unknown function (DUF3741)
			Phvul.008G062400	Phvul.008G062400.1	Protein of unknown function (DUF3245)
			Phvul.008G062500	Phvul.008G062500.1	RING/U-box superfamily protein
			Phvul.008G062600	Phvul.008G062600.1	RHO guanyl-nucleotide exchange factor 3
			Phvul.008G062600	Phvul.008G062600.2	RHO guanyl-nucleotide exchange factor 3
			Phvul.008G062700	Phvul.008G062700.1	2-oxoglutarate (2OG) and Fe(II)-dependent oxygenase superfamily protein
			Phvul.008G062700	Phvul.008G062700.2	2-oxoglutarate (2OG) and Fe(II)-dependent oxygenase superfamily protein
			Phvul.008G062800	Phvul.008G062800.1	Plant self-incompatibility protein S1 family
			Phvul.008G062900	Phvul.008G062900.1	Plant self-incompatibility protein S1 family
			Phvul.008G063000	Phvul.008G063000.1	Plant self-incompatibility protein S1 family
			Phvul.008G063100	Phvul.008G063100.1	Plant self-incompatibility protein S1 family
			Phvul.008G063200	Phvul.008G063200.1	Plant self-incompatibility protein S1 family
			Phvul.008G063300	Phvul.008G063300.1	Plant self-incompatibility protein S1 family
			Phvul.008G063400	Phvul.008G063400.1	Plant self-incompatibility protein S1 family
			Phvul.008G063500	Phvul.008G063500.1	Plant self-incompatibility protein S1 family
			Phvul.008G063600	Phvul.008G063600.1	Plant self-incompatibility protein S1 family
			Phvul.008G063700	Phvul.008G063700.1	Plant self-incompatibility protein S1 family
			Phvul.008G063800	Phvul.008G063800.1	Plant self-incompatibility protein S1 family
			Phvul.008G063900	Phvul.008G063900.1	Plant self-incompatibility protein S1 family
			Phvul.008G064000	Phvul.008G064000.1	Plant self-incompatibility protein S1 family
			Phvul.008G064100	Phvul.008G064100.1	Plant self-incompatibility protein S1 family
			Phvul.008G064200	Phvul.008G064200.1	Plant self-incompatibility protein S1 family
			Phvul.008G064300	Phvul.008G064300.1	Plant self-incompatibility protein S1 family
			Phvul.008G064400	Phvul.008G064400.1	Plant self-incompatibility protein S1 family
			Phvul.008G064500	Phvul.008G064500.1	Plant self-incompatibility protein S1 family
			Phvul.008G064600	Phvul.008G064600.1	Plant self-incompatibility protein S1 family
			Phvul.008G064700	Phvul.008G064700.1	Plant self-incompatibility protein S1 family
			Phvul.008G064800	Phvul.008G064800.1	Plant self-incompatibility protein S1 family
			Phvul.008G064900	Phvul.008G064900.1	Plant self-incompatibility protein S1 family
			Phvul.008G065000	Phvul.008G065000.1	Plant self-incompatibility protein S1 family
			Phvul.008G065100	Phvul.008G065100.1	Plant self-incompatibility protein S1 family
			Phvul.008G065200	Phvul.008G065200.1	Plant self-incompatibility protein S1 family
			Phvul.008G065300	Phvul.008G065300.1	Plant self-incompatibility protein S1 family
			Phvul.008G065400	Phvul.008G065400.1	Plant self-incompatibility protein S1 family
			Phvul.008G065500	Phvul.008G065500.1	Protein of unknown function (DUF3245)
			Phvul.008G065600	Phvul.008G065600.1	beta-amylase 7
			Phvul.008G065700	Phvul.008G065700.1	Acyl-CoA thioesterase family protein
			Phvul.008G065900	Phvul.008G065900.1	AT hook motif DNA-binding family protein
			Phvul.008G066200	Phvul.008G066200.1	Ribosomal protein S5 domain 2-like superfamily protein
			Phvul.008G066300	Phvul.008G066300.1	C2 calcium/lipid-binding plant phosphoribosyltransferase family protein
			Phvul.008G066400	Phvul.008G066400.1	RNAhelicase-like 8
			Phvul.008G066500	Phvul.008G066500.1	HOPZ-ACTIVATED RESISTANCE 1
			Phvul.008G066600	Phvul.008G066600.1	Leucine-rich repeat (LRR) family protein
			Phvul.008G066700	Phvul.008G066700.1	RNI-like superfamily protein
			Phvul.008G066800	Phvul.008G066800.1	Leucine-rich repeat (LRR) family protein
			Phvul.008G066900	Phvul.008G066900.1	Leucine-rich repeat (LRR) family protein
			Phvul.008G067000	Phvul.008G067000.1	Leucine-rich repeat (LRR) family protein
			Phvul.008G067100	Phvul.008G067100.1	Leucine-rich repeat (LRR) family protein
			Phvul.008G067100	Phvul.008G067100.2	Leucine-rich repeat (LRR) family protein
			Phvul.008G067200	Phvul.008G067200.1	RNI-like superfamily protein
			Phvul.008G067300	Phvul.008G067300.1	myb domain protein 17
			Phvul.008G067400	Phvul.008G067400.1	Remorin family protein
			Phvul.008G067500	Phvul.008G067500.1	GATA type zinc finger transcription factor family protein
			Phvul.008G067600	Phvul.008G067600.1	Serine/threonine-protein kinase Rio1
			Phvul.008G067700	Phvul.008G067700.1	SLOW GROWTH 1
			Phvul.008G067800	Phvul.008G067800.1	K+ efflux antiporter 2
			Phvul.008G067800	Phvul.008G067800.2	K+ efflux antiporter 2
			Phvul.008G068000	Phvul.008G068000.1	Amino acid dehydrogenase family protein
			Phvul.008G068100	Phvul.008G068100.1	phosphomannomutase
			Phvul.008G068200	Phvul.008G068200.1	NAD(P)-binding Rossmann-fold superfamily protein
			Phvul.008G068300	Phvul.008G068300.1	NAD(P)-binding Rossmann-fold superfamily protein
			Phvul.008G068400	Phvul.008G068400.1	Small nuclear ribonucleoprotein family protein
			Phvul.008G068500	Phvul.008G068500.1	NAD(P)-binding Rossmann-fold superfamily protein
			Phvul.008G068600	Phvul.008G068600.1	NAD(P)-binding Rossmann-fold superfamily protein
			Phvul.008G068700	Phvul.008G068700.1	NAD-dependent malic enzyme 2
			Phvul.008G069100	Phvul.008G069100.1	digalactosyl diacylglycerol deficient 2
			Phvul.008G069100	Phvul.008G069100.2	digalactosyl diacylglycerol deficient 2
			Phvul.008G069200	Phvul.008G069200.1	zinc knuckle (CCHC-type) family protein
			Phvul.008G069400	Phvul.008G069400.1	Major Facilitator Superfamily with SPX (SYG1/Pho81/XPR1) domain-containing protein
			Phvul.008G069500	Phvul.008G069500.1	peptidoglycan-binding LysM domain-containing protein
			Phvul.008G069600	Phvul.008G069600.1	RNI-like superfamily protein
			Phvul.008G069700	Phvul.008G069700.1	Pentatricopeptide repeat (PPR) superfamily protein
			Phvul.008G069800	Phvul.008G069800.1	EXS (ERD1/XPR1/SYG1) family protein
			Phvul.008G069800	Phvul.008G069800.2	EXS (ERD1/XPR1/SYG1) family protein
			Phvul.008G069900	Phvul.008G069900.1	SET domain-containing protein
			Phvul.008G070000	Phvul.008G070000.1	vacuolar iron transporter 1
			Phvul.008G070100	Phvul.008G070100.1	UDP-galactose transporter 2
			Phvul.008G070200	Phvul.008G070200.1	5\'-3\' exonuclease family protein
			Phvul.008G070300	Phvul.008G070300.1	Ribosomal RNA adenine dimethylase family protein
			Phvul.008G070500	Phvul.008G070500.1	RING/U-box superfamily protein
			Phvul.008G070600	Phvul.008G070600.1	Ribosomal protein L22p/L17e family protein
			Phvul.008G070800	Phvul.008G070800.1	NB-ARC domain-containing disease resistance protein
			Phvul.008G070800	Phvul.008G070800.2	NB-ARC domain-containing disease resistance protein
			Phvul.008G070900	Phvul.008G070900.1	Ribosomal protein L22p/L17e family protein
			Phvul.008G071200	Phvul.008G071200.1	NB-ARC domain-containing disease resistance protein
			Phvul.008G071300	Phvul.008G071300.1	NB-ARC domain-containing disease resistance protein
			Phvul.008G071300	Phvul.008G071300.2	LRR and NB-ARC domains-containing disease resistance protein
			Phvul.008G071400	Phvul.008G071400.1	LSD1-like 1
			Phvul.008G071500	Phvul.008G071500.1	NB-ARC domain-containing disease resistance protein
			Phvul.008G071600	Phvul.008G071600.1	Ribosomal protein L22p/L17e family protein
			Phvul.008G071700	Phvul.008G071700.1	ARM repeat superfamily protein
			Phvul.008G071700	Phvul.008G071700.2	ARM repeat superfamily protein
			Phvul.008G071700	Phvul.008G071700.3	ARM repeat superfamily protein
			Phvul.008G071800	Phvul.008G071800.1	peroxin 11c
			Phvul.008G071900	Phvul.008G071900.1	F-box family protein
			Phvul.008G072000	Phvul.008G072000.1	NB-ARC domain-containing disease resistance protein
			Phvul.008G072100	Phvul.008G072100.1	NB-ARC domain-containing disease resistance protein
			Phvul.008G072200	Phvul.008G072200.1	NB-ARC domain-containing disease resistance protein
			Phvul.008G072300	Phvul.008G072300.1	Disease resistance protein (CC-NBS-LRR class) family
			Phvul.008G072300	Phvul.008G072300.2	Disease resistance protein (CC-NBS-LRR class) family
			Phvul.008G072400	Phvul.008G072400.1	S-adenosyl-L-methionine-dependent methyltransferases superfamily protein
			Phvul.008G072500	Phvul.008G072500.1	S-adenosyl-L-methionine-dependent methyltransferases superfamily protein
			Phvul.008G072600	Phvul.008G072600.1	S-adenosyl-L-methionine-dependent methyltransferases superfamily protein
			Phvul.008G072700	Phvul.008G072700.1	Homeobox-leucine zipper family protein / lipid-binding START domain-containing protein
			Phvul.008G072800	Phvul.008G072800.1	shaggy-like protein kinase 32
			Phvul.008G072900	Phvul.008G072900.1	Tetratricopeptide repeat (TPR)-like superfamily protein
			Phvul.008G073000	Phvul.008G073000.1	RING/U-box superfamily protein
			Phvul.008G073100	Phvul.008G073100.1	BON association protein 2
			Phvul.008G073300	Phvul.008G073300.1	Thioesterase superfamily protein
			Phvul.008G073400	Phvul.008G073400.1	Calcium-dependent lipid-binding (CaLB domain) family protein
			Phvul.008G073500	Phvul.008G073500.1	RNI-like superfamily protein
			Phvul.008G073600	Phvul.008G073600.1	RNI-like superfamily protein
			Phvul.008G073700	Phvul.008G073700.1	xylem serine peptidase 1
			Phvul.008G073800	Phvul.008G073800.1	AGAMOUS-like 20
			Phvul.008G073900	Phvul.008G073900.1	pfkB-like carbohydrate kinase family protein
			Phvul.008G074000	Phvul.008G074000.1	galacturonosyltransferase 1
			Phvul.008G074100	Phvul.008G074100.1	Calcium-dependent lipid-binding (CaLB domain) family protein
			Phvul.008G074100	Phvul.008G074100.2	Calcium-dependent lipid-binding (CaLB domain) family protein
			Phvul.008G074200	Phvul.008G074200.1	early nodulin-like protein 18
			Phvul.008G074300	Phvul.008G074300.1	Flavoprotein
			Phvul.008G074400	Phvul.008G074400.1	PIF1 helicase
			Phvul.008G074500	Phvul.008G074500.1	HAL3-like protein A
			Phvul.008G074600	Phvul.008G074600.1	WD-40 repeat family protein / beige-related
			Phvul.008G074600	Phvul.008G074600.2	WD-40 repeat family protein / beige-related
			Phvul.008G074600	Phvul.008G074600.3	WD-40 repeat family protein / beige-related
			Phvul.008G074800	Phvul.008G074800.1	titan9
			Phvul.008G074900	Phvul.008G074900.1	AAA-type ATPase family protein
			Phvul.008G075000	Phvul.008G075000.1	FASCICLIN-like arabinogalactan-protein 10
			Phvul.008G075100	Phvul.008G075100.1	zinc finger protein-related
			Phvul.008G075200	Phvul.008G075200.1	SMAD/FHA domain-containing protein
			Phvul.008G075300	Phvul.008G075300.1	protein binding
			Phvul.008G075400	Phvul.008G075400.1	dihydrodipicolinate synthase
			Phvul.008G075500	Phvul.008G075500.1	armadillo repeat kinesin 2
			Phvul.008G075600	Phvul.008G075600.1	SEC7-like guanine nucleotide exchange family protein
			Phvul.008G075800	Phvul.008G075800.1	Aminotransferase-like, plant mobile domain family protein
			Phvul.008G075900	Phvul.008G075900.1	LOB domain-containing protein 18
			Phvul.008G076000	Phvul.008G076000.1	Microtubule associated protein (MAP65/ASE1) family protein
			Phvul.008G076100	Phvul.008G076100.1	AT-hook motif nuclear-localized protein 1
			Phvul.008G076100	Phvul.008G076100.2	AT-hook motif nuclear-localized protein 1
			Phvul.008G076100	Phvul.008G076100.3	AT-hook motif nuclear-localized protein 1
			Phvul.008G076100	Phvul.008G076100.4	AT-hook motif nuclear-localized protein 1
			Phvul.008G076100	Phvul.008G076100.5	AT-hook motif nuclear-localized protein 1
			Phvul.008G076200	Phvul.008G076200.1	Cornichon family protein
			Phvul.008G076200	Phvul.008G076200.2	Cornichon family protein
			Phvul.008G076200	Phvul.008G076200.3	Cornichon family protein
			Phvul.008G076200	Phvul.008G076200.4	Cornichon family protein
			Phvul.008G076300	Phvul.008G076300.1	sterol-4alpha-methyl oxidase 1-1
			Phvul.008G076400	Phvul.008G076400.1	Transducin/WD40 repeat-like superfamily protein
			Phvul.008G076500	Phvul.008G076500.1	NAD(P)-binding Rossmann-fold superfamily protein
			Phvul.008G076600	Phvul.008G076600.1	NAD(P)-binding Rossmann-fold superfamily protein
			Phvul.008G076600	Phvul.008G076600.2	NAD(P)-binding Rossmann-fold superfamily protein
			Phvul.008G076700	Phvul.008G076700.1	NAD(P)-binding Rossmann-fold superfamily protein
			Phvul.008G076800	Phvul.008G076800.1	Tetratricopeptide repeat (TPR)-like superfamily protein
			Phvul.008G076800	Phvul.008G076800.2	Tetratricopeptide repeat (TPR)-like superfamily protein
			Phvul.008G076900	Phvul.008G076900.1	galacturonosyltransferase 7
			Phvul.008G077000	Phvul.008G077000.1	GRAS family transcription factor
			Phvul.008G077100	Phvul.008G077100.1	phosphorylethanolamine cytidylyltransferase 1
			Phvul.008G077200	Phvul.008G077200.1	Protein kinase superfamily protein
			Phvul.008G077300	Phvul.008G077300.1	cysteine-rich RLK (RECEPTOR-like protein kinase) 25
			Phvul.008G077300	Phvul.008G077300.2	cysteine-rich RLK (RECEPTOR-like protein kinase) 25
			Phvul.008G077400	Phvul.008G077400.1	Zinc-binding ribosomal protein family protein
			Phvul.008G077500	Phvul.008G077500.1	cysteine-rich RLK (RECEPTOR-like protein kinase) 23
			Phvul.008G077500	Phvul.008G077500.2	cysteine-rich RLK (RECEPTOR-like protein kinase) 25
			Phvul.008G077600	Phvul.008G077600.1	cysteine-rich RLK (RECEPTOR-like protein kinase) 25
			Phvul.008G077700	Phvul.008G077700.1	cysteine-rich RLK (RECEPTOR-like protein kinase) 25
Productivity	Chr08	29.66 - 29.94	Phvul.008G147600	Phvul.008G147600.1	Plant transposase (Ptta/En/Spm family)
			Phvul.008G147700	Phvul.008G147700.1	GDSL-like Lipase/Acylhydrolase superfamily protein
			Phvul.008G147800	Phvul.008G147800.1	RmlC-like cupins superfamily protein
			Phvul.008G148000	Phvul.008G148000.1	alpha/beta-Hydrolases superfamily protein
			Phvul.008G148000	Phvul.008G148000.2	alpha/beta-Hydrolases superfamily protein
Productivity	Chr08	29.94 - 31.32	Phvul.008G148100	Phvul.008G148100.1	F-box and associated interaction domains-containing protein
			Phvul.008G148200	Phvul.008G148200.1	zinc finger (C3HC4-type RING finger) family protein
			Phvul.008G148300	Phvul.008G148300.1	hydrolases, acting on ester bonds
			Phvul.008G148400	Phvul.008G148400.1	hydrolases, acting on ester bonds
			Phvul.008G148500	Phvul.008G148500.1	hydrolases, acting on ester bonds
			Phvul.008G148500	Phvul.008G148500.2	hydrolases, acting on ester bonds
			Phvul.008G148600	Phvul.008G148600.1	hydrolases, acting on ester bonds
			Phvul.008G148700	Phvul.008G148700.1	glucose-6-phosphate dehydrogenase 6
			Phvul.008G148800	Phvul.008G148800.1	plant UBX domain-containing protein 1
			Phvul.008G149000	Phvul.008G149000.1	Plant transposase (Ptta/En/Spm family)
			Phvul.008G149300	Phvul.008G149300.1	pre-mRNA processing ribonucleoprotein binding region-containing protein
			Phvul.008G149300	Phvul.008G149300.2	pre-mRNA processing ribonucleoprotein binding region-containing protein
			Phvul.008G149400	Phvul.008G149400.1	alpha/beta-Hydrolases superfamily protein
			Phvul.008G149500	Phvul.008G149500.1	Ankyrin repeat family protein
			Phvul.008G149600	Phvul.008G149600.1	lysine histidine transporter 1
			Phvul.008G149700	Phvul.008G149700.1	lysine histidine transporter 1
			Phvul.008G149800	Phvul.008G149800.1	lysine histidine transporter 1
			Phvul.008G150000	Phvul.008G150000.1	DNA-binding storekeeper protein-related
			Phvul.008G150100	Phvul.008G150100.1	global transcription factor group E8
			Phvul.008G150100	Phvul.008G150100.2	global transcription factor group E8
